# Supplementary material
Source: Springer Nature journal article supplement (https://www.springermedizin.de/resource/supplementary/12889_2011_3458_MOESM2_ESM.pdf/9489132)
Supplement: MOESM2 [file 9489132]

**a)**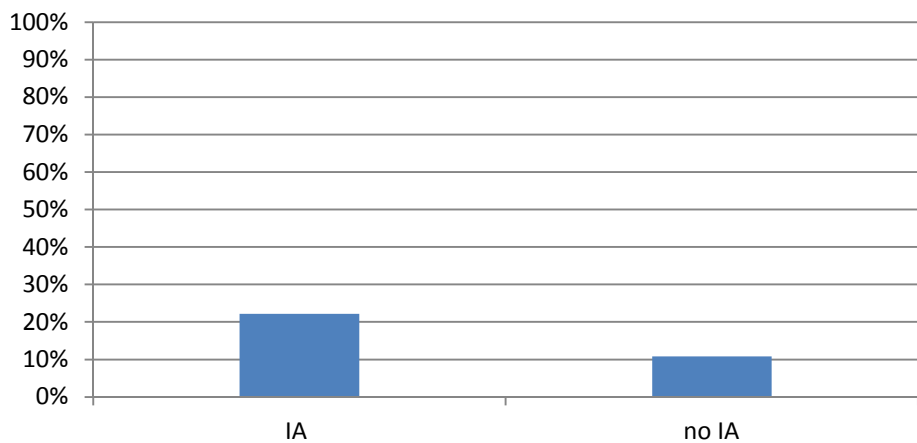

647 women with missing IA information were excluded from graph

**b)**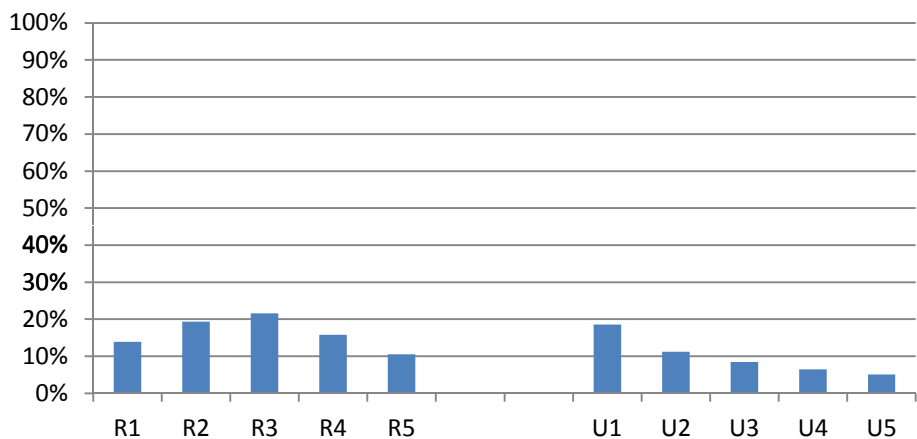

1074 women with missing income information were excluded from graph

**c)**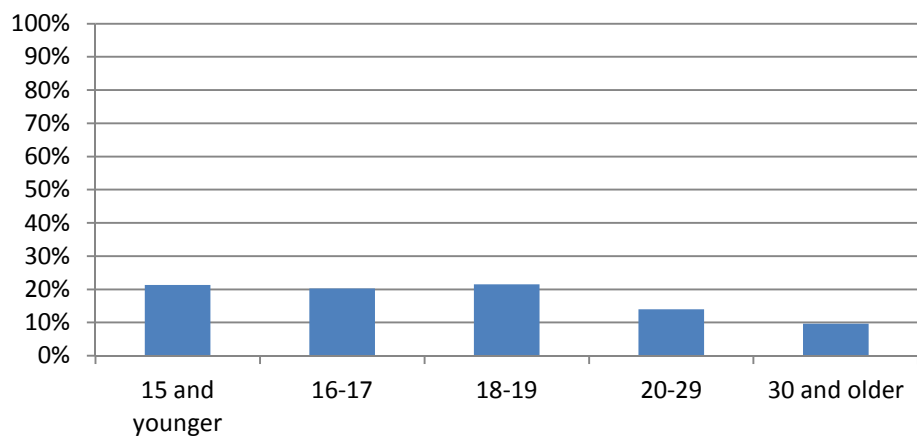

180 women with missing age information were excluded from graph
